# Supplementary material for: A QTL for root growth angle on rice chromosome 7 is involved in the genetic pathway of DEEPER ROOTING 1
Source: PubMed Central journal article supplement (PMC4384719; doi:10.1186/s12284-015-0044-7), 2015-02-05
Supplement: 12284_2015_44_MOESM1_ESM.pdf [file 12284_2015_44_MOESM1_ESM.pdf]

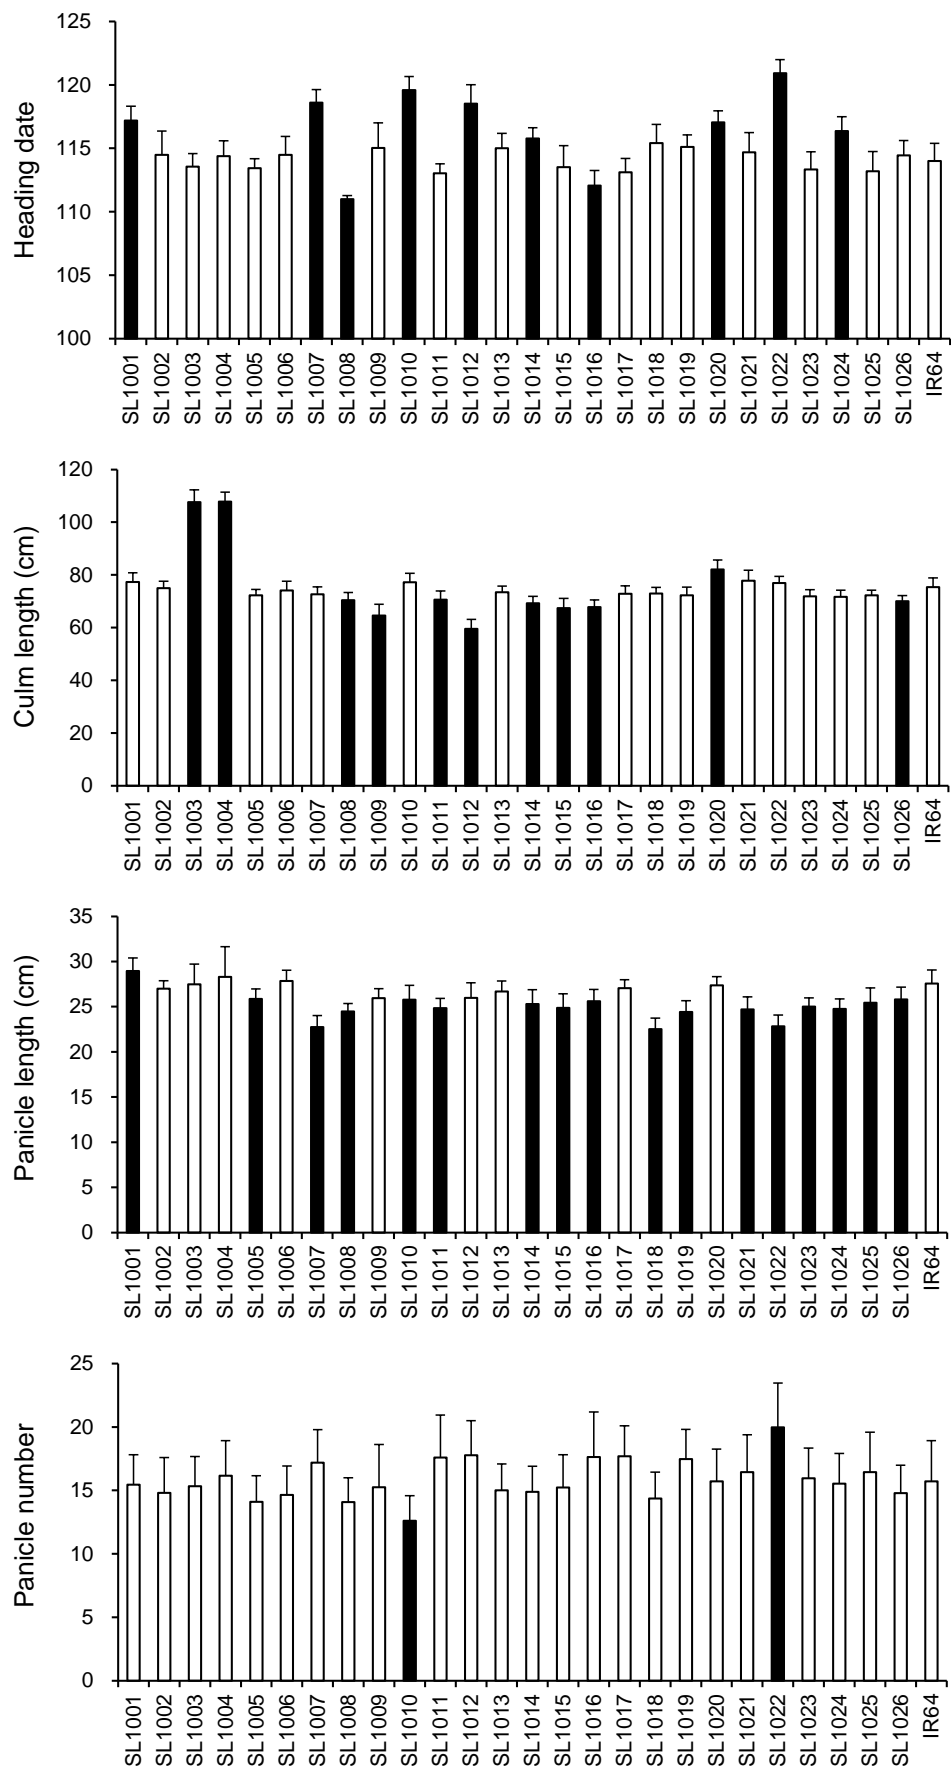

**Figure S1. Shoot physiological and morphological traits of the 26 IK-CSSLs and of IR64.**

Values are means+SD ( $n = 27$ ) for each line. Black bars indicate a significant difference between the IK-CSSL and IR64 ( $p < 0.001$ , Dunnett's test).
