# Supplementary material for: A QTL for root growth angle on rice chromosome 7 is involved in the genetic pathway of DEEPER ROOTING 1
Source: PubMed Central journal article supplement (PMC4384719; doi:10.1186/s12284-015-0044-7), 2015-02-05
Supplement: 12284_2015_44_MOESM4_ESM.pdf [file 12284_2015_44_MOESM4_ESM.pdf]

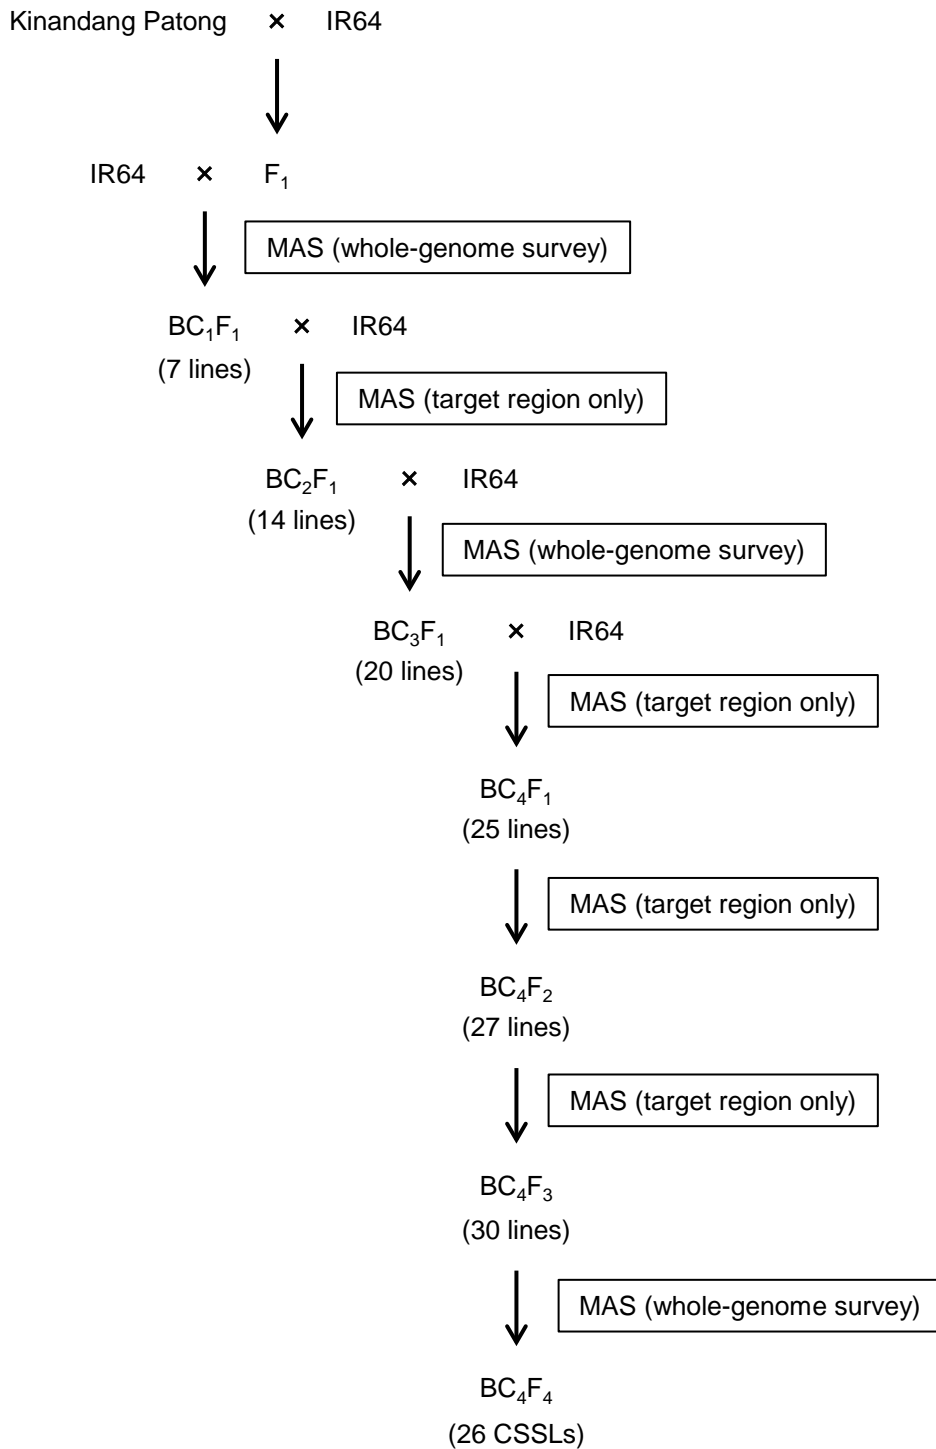

**Figure S4.** Illustration of the scheme used to develop chromosome segment substitution lines (IK-CSSLs) carrying Kinandang Patong chromosome segments in the IR64 genetic background. MAS, marker-assisted selection.
